# Supplementary material for: Elevated CXCL12 in the plasma membrane of locally advanced rectal cancer after neoadjuvant chemoradiotherapy: a potential prognostic marker
Source: PubMed Central journal article supplement (PMC8692683; doi:10.7150/jca.64082), 2022-01-01

Supplementary Table 1. Clinicopathological factors in the locally advanced rectal cancer cells treated with neoadjuvant chemoradiotherapy group and untreated with neoadjuvant chemoradiotherapy group

| Variable                 | No. | LARC-nCRT | LARC-no nCRT | <i>p</i> *   |
|--------------------------|-----|-----------|--------------|--------------|
| <b>Gender</b>            |     | <b>61</b> | <b>60</b>    | <b>0.406</b> |
| Male                     | 79  | 42        | 37           |              |
| Female                   | 42  | 19        | 23           |              |
| <b>Age (years)</b>       |     |           |              | <b>0.019</b> |
| ≤65                      | 74  | 31        | 43           |              |
| >65                      | 47  | 30        | 17           |              |
| <b>(y)pT</b>             |     |           |              | <b>0.010</b> |
| 2                        | 44  | 29        | 15           |              |
| 3                        | 77  | 32        | 45           |              |
| <b>(y)pN</b>             |     |           |              | <b>0.762</b> |
| 0                        | 75  | 37        | 38           |              |
| 1-2                      | 46  | 24        | 22           |              |
| <b>(y)p TNM stage</b>    |     |           |              | <b>0.626</b> |
| II                       | 74  | 36        | 38           |              |
| III                      | 47  | 25        | 22           |              |
| <b>Post-Chemotherapy</b> |     |           |              | <b>0.636</b> |
| No                       | 30  | 14        | 16           |              |
| Yes                      | 91  | 47        | 44           |              |

\* Pearson's chi-square test; nCRT, neoadjuvant chemoradiotherapy; pStage, pathologic stage; LARC-nCRT, locally advanced rectal cancer cells treated with neoadjuvant chemoradiotherapy group; LARC-no nCRT, locally advanced rectal cancer cells untreated with neoadjuvant chemoradiotherapy group; ypTNM stage, neoadjuvant pathologic stage in American Joint Committee on Cancer (AJCC) cancer staging system (8th edition); and post-chemotherapy, post-operative adjuvant chemotherapy.

Supplementary Table 2. Correlations between the levels of CXCL12, CXCR4, and FAP $\alpha$  in the locally advanced rectal cancer cells treated with neoadjuvant chemoradiotherapy group using immunohistochemical staining.

| Spearman's rho |                         | CXCL12  | CXCR4   | FAP $\alpha$ |
|----------------|-------------------------|---------|---------|--------------|
| CXCL12         | Correlation coefficient | 1.000   | 0.402** | 0.372**      |
|                | Sig. (2-tailed)         | .       | 0.001   | 0.003        |
|                | No.                     | 61      | 61      | 61           |
| CXCR4          | Correlation coefficient | 0.402** | 1.000   | 0.402**      |
|                | Sig. (2-tailed)         | 0.001   | .       | 0.001        |
|                | No.                     | 61      | 61      | 61           |
| FAP $\alpha$   | Correlation coefficient | 0.372** | 0.402** | 1.000        |
|                | Sig. (2-tailed)         | 0.003   | 0.001   | .            |
|                | No.                     | 61      | 61      | 61           |

\*\* , *p* < 0.01

Supplementary **Table 3.** Univariate analysis of overall survival and freedom from recurrence in 60 patients with locally advanced rectal cancers untreated with neoadjuvant chemoradiotherapy.

| Prognostic factor                        | Overall survival    |            | Freedom From Recurrence |            |
|------------------------------------------|---------------------|------------|-------------------------|------------|
|                                          | HR (95% CI)         | <i>p</i> * | HR (95% CI)             | <i>p</i> * |
| <b>CXCL12 expression</b>                 | 0.521 (0.210-1.292) | 0.160      | 1.069 (0.408-2.797)     | 0.892      |
| <b>CXCR4 expression</b>                  | N/A                 | N/A        | N/A                     | N/A        |
| <b>FAP<math>\alpha</math> expression</b> | 0.859 (0.556-1.327) | 0.493      | 1.301 (0.782-2.164)     | 0.311      |
| <b>Age at operation</b>                  |                     | 0.007      |                         | 0.963      |
| ≤65 (n=43)                               | 1 (reference)       |            | 1 (reference)           |            |
| >65 (n=17)                               | 3.286 (1.391-7.764) |            | 1.032 (0.271-3.935)     |            |
| <b>Sex</b>                               |                     | 0.326      |                         | 0.597      |
| Male (n=37)                              | 1 (reference)       |            | 1 (reference)           |            |
| Female (n=23)                            | 1.537 (0.652-3.621) |            | 1.380 (0.418-4.558)     |            |
| <b>pTNM stage</b>                        |                     | 0.424      |                         | 0.224      |
| II (n=38)                                | 1 (reference)       |            | 1 (reference)           |            |
| III (n=22)                               | 0.679 (0.264-1.752) |            | 2.090 (0.638-6.850)     |            |
| <b>Post-Chemotherapy</b>                 |                     | 0.207      |                         | 0.525      |
| No (n=16)                                | 1 (reference)       |            | 1 (reference)           |            |
| Yes (n=44)                               | 0.567 (0.235-1.370) |            | 1.645 (0.355-7.621)     |            |
| <b>Post-radiotherapy</b>                 |                     | 0.555      |                         | 0.716      |
| No (n=25)                                | 1 (reference)       |            | 1 (reference)           |            |
| Yes (n=35)                               | 0.773 (0.328-1.820) |            | 1.256 (0.368-4.294)     |            |

\* Univariate Cox regression analysis; HR, hazard ratio; CI, confidence interval; CXCL12 expression, plasma membrane expression in cancer cells, scored as 0,1,2, or 3; CXCR4 expression, plasma membrane expression in cancer cells, scored as 0,1,2, or 3, All 60 cases are score 1.; FAP $\alpha$  expression, cytoplasmic expression in cancer cells, scored as 0,1,2, or 3; pTNM stage, pathologic stage in American Joint Committee on Cancer (AJCC) cancer staging system (8<sup>th</sup> edition); post-chemotherapy, post-operative adjuvant chemotherapy; and post-radiotherapy, post-operative adjuvant radiotherapy; and N/A, not applicable.

Supplementary **Table 4.** Multivariate analysis of overall survival and freedom from recurrence in 60 patients with locally advanced rectal cancers untreated with neoadjuvant chemoradiotherapy.

| Prognostic factor                        | Overall survival    |            | Freedom From Recurrence |            |
|------------------------------------------|---------------------|------------|-------------------------|------------|
|                                          | HR (95% CI)         | <i>p</i> * | HR (95% CI)             | <i>p</i> * |
| <b>CXCL12 expression</b>                 | 0.499 (0.184-1.351) | 0.171      | 0.764 (0.271-2.152)     | 0.610      |
| <b>FAP<math>\alpha</math> expression</b> | 0.837 (0.541-1.295) | 0.424      | 1.267 (0.738-2.174)     | 0.391      |
| <b>Age at operation</b>                  |                     | 0.012      |                         | 0.881      |
| ≤65 (n=43)                               | 1 (reference)       |            | 1 (reference)           |            |
| >65 (n=17)                               | 3.518 (1.313-9.424) |            | 1.123 (0.246-5.117)     |            |
| <b>Sex</b>                               |                     | 0.508      |                         | 0.734      |
| Male (n=37)                              | 1 (reference)       |            | 1 (reference)           |            |
| Female (n=23)                            | 1.373 (0.537-3.505) |            | 1.253 (0.341-4.600)     |            |
| <b>pTNM stage</b>                        |                     | 0.865      |                         | 0.350      |
| II (n=38)                                | 1 (reference)       |            | 1 (reference)           |            |
| III (n=22)                               | 0.909 (0.303-2.729) |            | 1.990 (0.470-8.422)     |            |
| <b>Post-Chemotherapy</b>                 |                     | 0.928      |                         | 0.785      |
| No (n=16)                                | 1 (reference)       |            | 1 (reference)           |            |
| Yes (n=44)                               | 1.084 (0.190-6.201) |            | 1.385 (0.133-14.461)    |            |
| <b>Post-radiotherapy</b>                 |                     | 0.803      |                         | 0.883      |
| No (n=25)                                | 1 (reference)       |            | 1 (reference)           |            |
| Yes (n=35)                               | 1.218 (0.259-5.722) |            | 0.883 (0.168-4.641)     |            |

\* Multivariate Cox regression analysis; HR, hazard ratio; CI, confidence interval; CXCL12 expression, plasma membrane expression in cancer cells, scored as 0,1,2, or 3; FAP $\alpha$  expression, cytoplasmic expression in cancer cells, scored as 0,1,2, or 3; pTNM stage, pathologic stage in American Joint Committee on Cancer (AJCC) cancer staging system (8<sup>th</sup> edition); post-chemotherapy, post-operative adjuvant chemotherapy; and post-radiotherapy, post-operative adjuvant radiotherapy.

**Supplementary Figure 1.** Correlation between CXCL12/CXCR4 expression and FAP $\alpha$  in locally advanced rectal cancer (LARC). A significant positive correlation between CXCL12/CXCR4 and FAP $\alpha$  expression was observed in LARC.

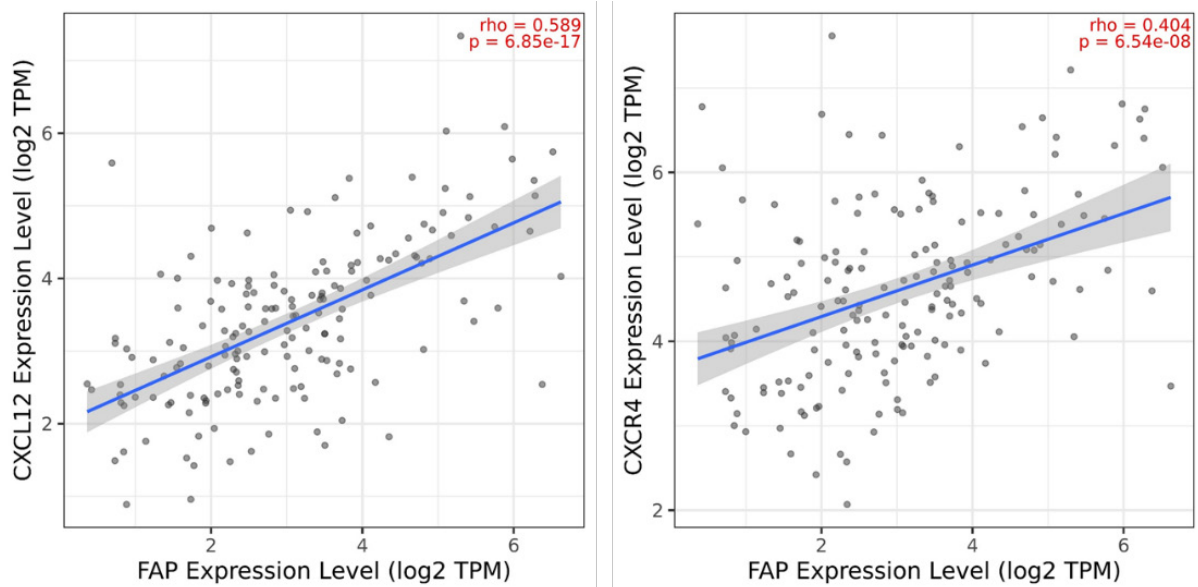

**Supplementary Figure 2.** Correlation between CXCR4 and FAP $\alpha$  expression and patient survival in locally advanced rectal cancer. Kaplan-Meier curves for low and high groups of the CXCR4 and FAP $\alpha$  gene expression in GSE133057 dataset. CXCR4 and FAP $\alpha$  mRNA expression levels are not significant prognostic factors for overall survival in GSE133057.

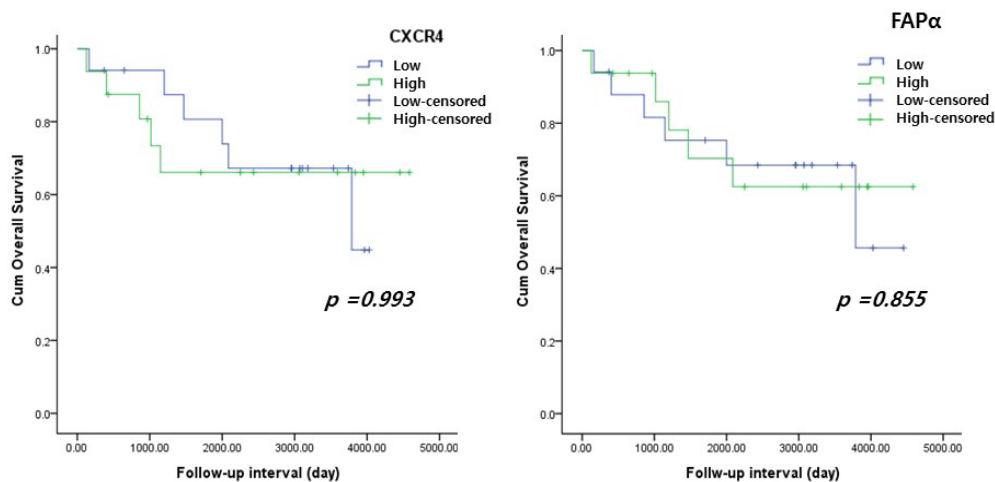

**Supplementary Figure 3.** Correlation of CXCL12 expression with immune infiltration level in LARC.

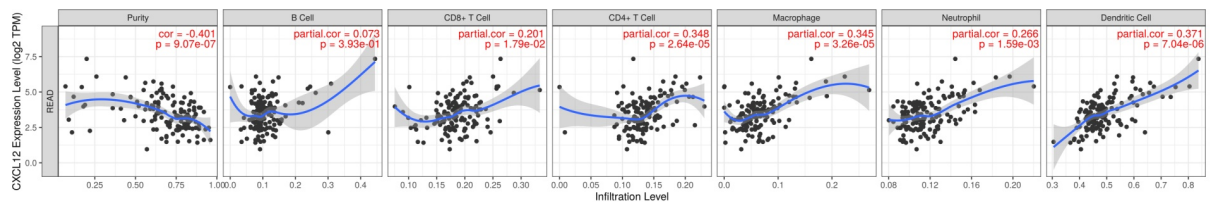

**Supplementary Figure 4.** Changes in CXCL12 and CXCR4 levels in pre-neoadjuvant chemoradiotherapy (nCRT) biopsy and paired post-nCRT surgical specimen tissue samples from 45 LARC patients showed higher expression in LARC cancer cells after nCRT ( $p < 0.001$  for each, Wilcoxon signed-rank test).

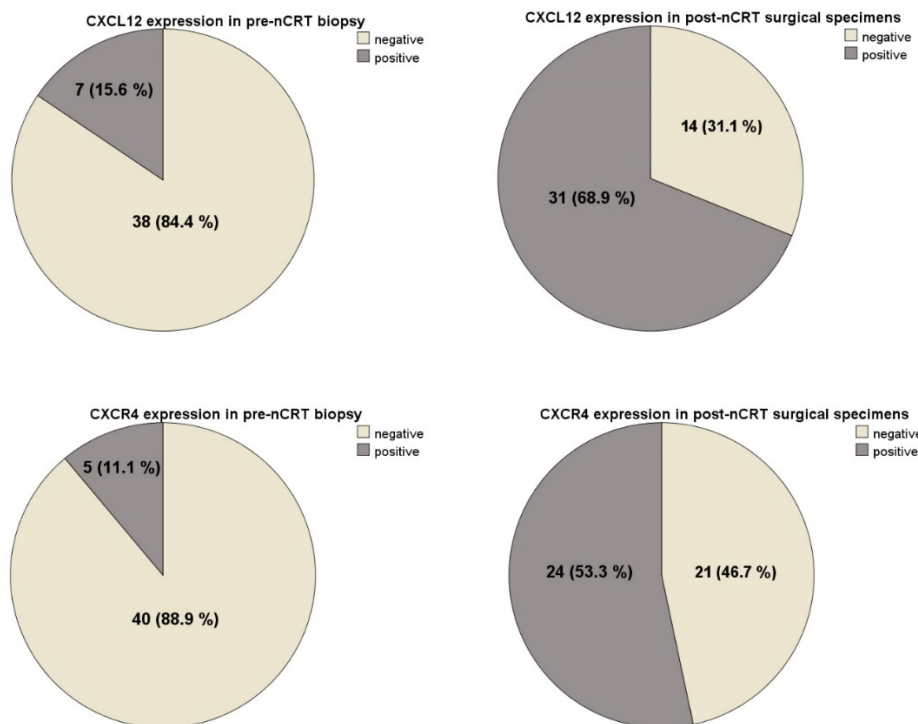

**Supplementary Figure 5.** Images showing immunohistochemical staining of CXCL12, CXCR4, and FAP $\alpha$  in the case of each pathways in non-neoplastic rectal glands (A, C, E) and rectal tubular adenoma (B, D, F). In both, CXCL12 and CXCR4 showed no plasma membrane expression (A, B, C, D) and FAP $\alpha$  exhibited little or no expression in the epithelial cells (E, F) (original magnification 400 $\times$ ; scale bar= 50  $\mu$ m).

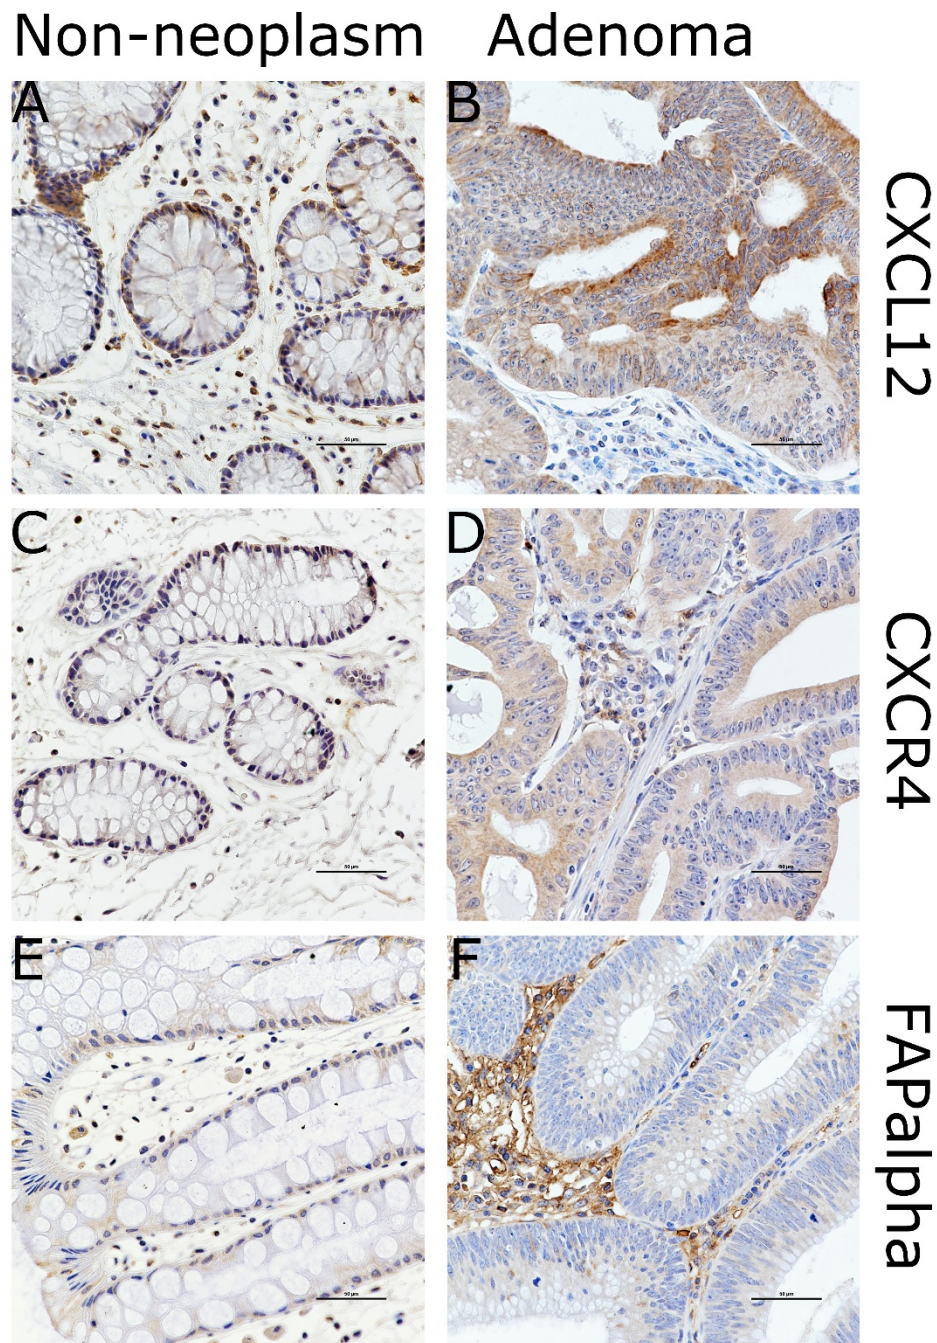

Supplement: jcav13p0162s1.pdf [file jcav13p0162s1.pdf]
